# Table of Contents

## FEATURES

### *From the National Academies*

#### **Understanding Interventions that Encourage Minorities to Pursue Research Careers: Major Questions and Appropriate Methods**

Adam P. Fagen and Jay B. Labov .....187–189

### *Point of View: Textbooks—Essential or Superfluous?*

#### **Teaching without a Textbook: Strategies to Focus Learning on Fundamental Concepts and Scientific Process**

M. W. Klymkowsky .....190–193

### *Book Review*

#### **Living with History**

Mark E. Borrello .....194–195

## LETTER TO THE EDITOR

### **Make Microarray Data with Known Ratios**

A. Malcolm Campbell, William T. Hatfield, and Laurie J. Heyer .....196–197

## ESSAY

### **High School Biology Today: What the Committee of Ten Actually Said**

Keith Sheppard and Dennis M. Robbins .....198–202

## ARTICLES

### **Supplemental Instruction in Introductory Biology I: Enhancing the Performance and Retention of Underrepresented Minority Students**

Kenneth A. Rath, Alan R. Peterfreund, Samuel P. Xenos, Frank Bayliss, and Nancy Carnal .....203–216

### **The Value of Animations in Biology Teaching: A Study of Long-Term Memory Retention**

Danton H. O'Day .....217–223

### **Characterization of Human Genetics Courses for Nonbiology Majors in U.S. Colleges and Universities**

Bethany Vice Bowling, Carl A. Huether, and Jennifer A. Wagner .....224–232

### **Graduate Experience in Science Education: The Development of a Science Education Course for Biomedical Science Graduate Students**

Dina G. Markowitz and Michael J. DuPré .....233–242

### **Increased Learning Observed in Redesigned Introductory Biology Course that Employed Web-enhanced, Interactive Pedagogy**

Carl N. McDaniel, Bradford C. Lister, Michael H. Hanna, and Harry Roy .....243–249

*A goal of CBE—Life Sciences Education is to stimulate dialogue; therefore, readers are invited to submit comments on these articles through Letters to the Editor at <http://www.lifescied.org>.*

### *On the Cover*

The cover animation, supplied with a popular cell biology text,<sup>1</sup> schematically illustrates the processes of condensation and nuclear fragmentation through phagocytosis during the programmed death (apoptosis) of a eukaryotic cell. Animations are now commonly supplied on CDs packaged with textbooks and are used widely in the teaching of molecular processes and other complex biological phenomena. But are they more effective as learning tools than the static color images in the books? In an article on p. 217 of this issue, O'Day compares student retention of concepts after instruction using either animations or static graphics derived from them.

<sup>1</sup> From *Molecular Cell Biology* 4.0, CD-ROM distributed with *Molecular Cell Biology*, Lodish, H., et al., W. H. Freeman and Co., New York, NY, 4th Edition (2000). Used with permission.
